# Supplementary material for: Change of Direction Speed and Technique Modification Training Improves 180° Turning Performance, Kinetics, and Kinematics
Source: MDPI journal article supplement (doi:10.3390/sports9060073), 2021-05-24
Supplement: s1 [file s1]

**Supplementary material 2. Definitions and calculations for kinetic and kinematic variables examined during turning**

|                                   | Variable                                              | Foot contact | Abbreviation | Definition or calculation                                                                                                                                                                                                                                                                                                                                                                                                                                                                                        |
|-----------------------------------|-------------------------------------------------------|--------------|--------------|------------------------------------------------------------------------------------------------------------------------------------------------------------------------------------------------------------------------------------------------------------------------------------------------------------------------------------------------------------------------------------------------------------------------------------------------------------------------------------------------------------------|
| Sagittal plane joint angles       | Knee flexion angle; hip flexion angle                 | FFC/PFC      | KFA, HFA     | Derived from the following order of rotations: flexion (+)/extension (-). Absolute angle of two segments relative to a vertical line. Greater values indicate increased hip flexion, knee flexion.                                                                                                                                                                                                                                                                                                               |
|                                   | Mean horizontal braking force (Fx)                    | PFC          | Mean HBF     | Average normalised HGRF (Fx) during weight acceptance                                                                                                                                                                                                                                                                                                                                                                                                                                                            |
| GRF                               | Mean horizontal propulsive force (Fx)                 | FFC          | Mean HPF     | Average normalised HGRF (Fx) during push-off                                                                                                                                                                                                                                                                                                                                                                                                                                                                     |
|                                   | Horizontal to vertical braking/propulsive force ratio | PFC and FFC  | -            | Horizontal force / Vertical force (greater value = greater horizontal force contribution)                                                                                                                                                                                                                                                                                                                                                                                                                        |
|                                   | Ground contact time                                   | PFC and FFC  | GCT          | Duration from IC to toe-off                                                                                                                                                                                                                                                                                                                                                                                                                                                                                      |
| Trunk, pelvis, and foot variables | Lateral trunk flexion                                 | FFC          | -            | Angle of trunk relative to vertical line perpendicular to the pelvis in frontal plane: (0°) upright / (+) medial trunk flexion away from plant foot/ (-) lateral trunk flexion towards plant foot. At IC.                                                                                                                                                                                                                                                                                                        |
|                                   | Forward trunk inclination angle                       | FFC          | -            | Angle of trunk relative to a vertical line, (+) forward trunk lean/ (-) backward trunk lean                                                                                                                                                                                                                                                                                                                                                                                                                      |
|                                   | Pelvic rotation                                       | FFC          | -            | Angle of pelvis in transverse plane relative to global coordinate system. (0°) straight and perpendicular, (+) rotation towards intended direction of travel (-) rotation away from intended direction of travel. At IC.                                                                                                                                                                                                                                                                                         |
|                                   | Lateral foot plant distance                           | FFC          | -            | Lateral distance from initial foot contact of foot COM to proximal end of pelvis                                                                                                                                                                                                                                                                                                                                                                                                                                 |
|                                   | Initial foot progression angle                        | FFC          | IFPA         | Angle of foot progression relative to global coordinate system: straight (0°)/inward rotation (+)/outward rotation (-) angle (°). At IC.                                                                                                                                                                                                                                                                                                                                                                         |
|                                   |                                                       |              |              | The first derivative of the model COM (combined lower-limb and trunk model) position was computed to derive anterior-posterior (x), vertical (z), and ML (y) over the PFC and FFC. Resultant horizontal plane velocity was calculated using the following formula: $\sqrt{((\text{COM vel (x)})^2 + (\text{COM vel (y)})^2)}$ to provide a “velocity profile” along the path of the participants COM during the cut. Model COM velocity at PFC touch-down (approach), FFC touch-down, and toe-off in FFC (exit). |
| Velocity/COM                      | Horizontal velocity of COM                            | PFC and FFC  | -            |                                                                                                                                                                                                                                                                                                                                                                                                                                                                                                                  |

Key: PFC: Penultimate foot contact; FFC: Final foot contact; COM: Centre of mass; COD: Change of direction; IC: Initial contact; GRF: Ground reaction force; HGRF: Horizontal GRF; MLGRF: Medio-lateral GRF; vel: velocity; ROM: Range of motion.
